# Supplementary material
Source: Elsevier journal article supplement (https://www.sciencedirect.com/science/article/pii/S0210570519302638)

**Anexo A**: cuestionario-items demográficos


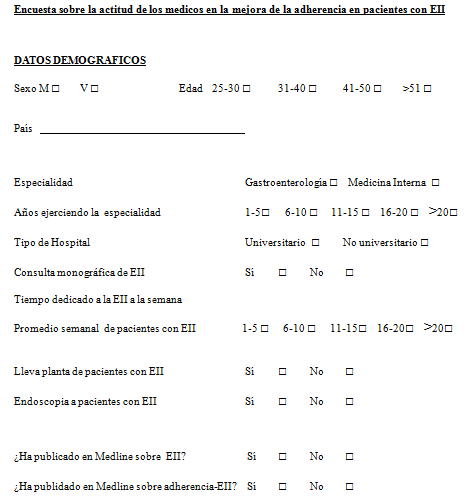


**Anexo B:** cuestionario-items demográficos y relacionados con la experiencia laboral


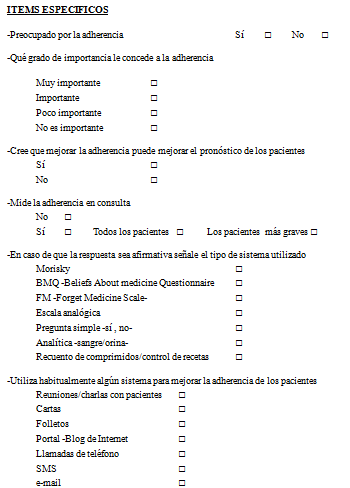

Supplement: mmc1 [file S0210570519302638:mmc1.docx]
